# Supplementary material for: Cerebellum encodes and influences the initiation, performance, and termination of discontinuous movements in mice
Source: eLife. 2022 Apr 22;11:e71464. doi: 10.7554/eLife.71464 (PMC9075950; doi:10.7554/eLife.71464)
Supplement: Figure 4—source data 1. [file elife-71464-fig4-data1.xlsx]

## Sheet: Sheet1
	Pre Water		Post Water
	Crus I	Crus II	Crus I	Crus II
	-0.3	-0.3	-0.1	-0.2
	-0.3	-0.3	-0.1	-0.3
	-0.3	-0.4		-0.4
	-0.4	-0.3		-0.2
	-0.3	-0.3		0
	-0.3	-0.2		0.3
	-0.3	-0.3		-0.1
	-0.3	-0.3		0.2
	-0.2	-0.2		-0.2
	-0.2	-0.2
	-0.3	-0.5
	0	-0.5
	-0.3	-0.3
	-0.3	-0.4
	-0.3	-0.6
	-0.1	-0.1
	-0.2	-0.3
	-0.1	-0.4
	-0.2	-0.3
	-0.3	-0.3
		-0.3
		-0.3
