# Supplementary material for: Cerebellum encodes and influences the initiation, performance, and termination of discontinuous movements in mice
Source: eLife. 2022 Apr 22;11:e71464. doi: 10.7554/eLife.71464 (PMC9075950; doi:10.7554/eLife.71464)
Supplement: Figure 6—source data 1. [file elife-71464-fig6-data1.xlsx]

## Sheet: Sheet1
	Pre Water	Post Water
	-0.201	-0.201
	-0.2345	-0.2345
	-0.335	-0.134
	-0.1675	-0.067
	-0.201	-0.067
	0.3685	-0.1675
	-0.2345	-0.1675
	0.1005	-0.067
	-0.2345	0.201
	-0.2345	-0.1675
	-0.1675	-0.134
	-0.2345	-0.134
	-0.2345	0.268
	-0.2345	0.134
	-0.201	-0.1675
	-0.2345	0.201
	-0.2345	-0.201
	-0.201	-0.201
	-0.201	-0.2345
	-0.2345	-0.2345
	-0.1675	-0.2345
	-0.1675	-0.2345
	-0.2345	-0.201
	-0.201	-0.1005
	-0.201	-0.134
	-0.1675	0.4355
	-0.1675	-0.1675
	-0.0335	-0.1675
	0.469	-0.1675
	-0.201	0.268
	-0.2345	-0.1675
	0.469	-0.402
	0.2345	-0.067
	0.134	-0.1005
	0.201	-0.067
	-0.3015	-0.1675
	0.3015	-0.402
	-0.402	-0.402
	-0.268	-0.0335
	-0.067	0.067
	-0.201	-0.134
	-0.4355	0.1005
	-0.201	-0.0335
	-0.2345	-0.0335
	-0.2345	-0.0335
	-0.067	-0.067
	-0.0335	-0.067
	-0.1005	-0.0335
	-0.067	-0.067
	-0.3015
	-0.134
	-0.067
