# Supplementary material for: Cerebellum encodes and influences the initiation, performance, and termination of discontinuous movements in mice
Source: eLife. 2022 Apr 22;11:e71464. doi: 10.7554/eLife.71464 (PMC9075950; doi:10.7554/eLife.71464)
Supplement: Figure 7—source data 1. [file elife-71464-fig7-data1.xlsx]

## Sheet: Sheet1
Panel B	Pre stim	During	Post Stim		Panel E	Unilateral			Bilateral			No ChR2				Panel H	Unilateral		Bilateral		No ChR2
	96.5278	235	128.29			Pre	During	Post	Pre	During	Post	Pre	During	Post			On	Rebound	On	Rebound	On	Rebound
	52.0833	197	61.1842			0.00095915	0.0132	0.0071	0.00058711	0.1702	0.0201	0.00019062	0.0029095	0.00034492			0	1.83333	0.576923	5	1	0
	93.0556	222	101.974			0.0008053	0.0597	0.0048	0.002	0.0502	0.0013	0.00010021	0.0049	0.00070061			0	2.375	No data	1	0.7	0.7
	51.3889	153	62.5			0.0065	0.1083	0.0062	0.0003954	0.2066	0.00017	5.9798e-05	4.2615e-05	0.00015466			0.5	2.66667	No data	0.833333	0.846185	0.634615
	58.3333	129	79.6053			0.0021	0.0221	0.0003929	0.0174	0.1609	0.0157	0.0074844	0.0067668	0.0062556			0	7.58333	0	0.8125	1	0.333333
	90.2778	192	97.3684			0.00033062	0.1246	0.0004735	0.0017	0.0331	0.0023	0.0028	0.0028	0.0055			0.607143	2.18571	1	4.15385	2	0
						0.00034251	0.1359	0.0106	0.0011	0.5666	0.00040862	0.0096	0.0034	0.0066			No data	1	0.392857	5.5	0.196078	2.94118
						0.0103	0.0543	0.008	3.2275e-05	0.0888	0.0262						No data	0	0.222222	7	0.952381	0
						0.0024	0.0432	0.0169	0.00016027	0.3291	0.0344						0	0.9	0.145833	2.91667	2.5	1.25
						0.0172	0.0294	0.0094	7.7729e-05	0.0866	No data						0	2.33333	0.212121	8.90909	0.45	2.25
						0.00030833	0.0047	3.8843e-05									0	0			0	0.5
						0.00038812	0.0532	0.0012													1.44	0.288889
						0.009	0.0303	0.0321													3.42857	0
